# Supplementary material for: Controlled silanization and biomolecular conjugation via ultra-stable carboxyl silatrane for neurofilament light chain detection
Source: Royal Society of Chemistry journal article supplement (doi:10.1039/d5ma01020a), 2025-12-24
Supplement: d5ma01020a1.pdf [file d5ma01020a1.pdf]

## Supporting Information

### **Controlled Silanization and Biomolecular Conjugation via Ultra-Stable Carboxyl Silatrane for Neurofilament Light Chain Detection**

*Van-Truc Vu*<sup>a</sup>, *Pei-Yun Hsiao*<sup>b</sup>, *Ting-Chou Chang*<sup>c</sup>, *Lai-Kwan Chau*<sup>b,d,\*</sup>, *Chun-Jen  
Huang*<sup>a,e,f,\*</sup>

<sup>a</sup> Department of Chemical & Materials Engineering, National Central University, Jhong-Li, Taoyuan 320, Taiwan.

<sup>b</sup> Department of Chemistry and Biochemistry, National Chung Cheng University, 168 University Rd., Minhsiung, Chiayi 621301, Taiwan.

<sup>c</sup> Instant NanoBiosensors Co., Ltd., Taipei City 115010, Taiwan.

<sup>d</sup> Center for Nano Bio-Detection, National Chung Cheng University, 168 University Rd., Minhsiung, Chiayi 621301, Taiwan.

<sup>e</sup> R&D Center for Membrane Technology, Chung Yuan Christian University, 200 Chung Pei Rd., Chung-Li City 32023, Taiwan.

<sup>f</sup> School of Materials Science and Engineering, The University of New South Wales, Sydney, NSW 2052, Australia.

\* Corresponding authors.

E-mail: [chelkc@ccu.edu.tw](mailto:chelkc@ccu.edu.tw) (LKC); [cjhuang@ncu.edu.tw](mailto:cjhuang@ncu.edu.tw) (CJH)

### Hydrolysis assessment

The ability of COOHSiT and COOHSi to maintain their structure in an environment with water was assessed using a 600 MHz  $^1\text{H}$  NMR (AVANCE III HD 600MHz NMR, Bruker, UK). A solution of D-methanol with 10% (v/v) deionized water was utilized as the solvent for the NMR analysis, and the ethoxy group signals (chemical shift  $\delta = 3.8$  ppm and 1.2 ppm) along with the silatranyl ring signals ( $\delta = 3.0$  and 3.8 ppm) were tracked over time. The signals of a fixed  $\text{CH}_2$  group in the unchanging part of the COOHSiT and COOHSi molecules were selected as standards and the signal changes of the Silatrane/Silane groups were calculated based on the standard signals.

### Cytotoxicity test

MTT (3-[4,5-dimethylthiazol-2-yl]-2,5 diphenyl tetrazolium bromide) assay was chosen as a colorimetric indicator for the cell viability of L-929 (NCTC clone 929), a mouse connective tissue cell line, after exposed to COOHSiT or COOHSi. To each single slot of a 24-well plate,  $10^4$  cells contained in 1 mL  $\alpha$ -MEM ( $\alpha$ -modified Eagle's minimum essential medium) with 10% horse serum were seeded and cultured at maintained condition of  $37^\circ\text{C}$ , 5%  $\text{CO}_2$ , 95% air in 100% humidity. After 16 h, the culture medium was replaced by 250  $\mu\text{L}$  of  $\alpha$ -MEM including serially diluted COOHSiT or COOHSi (0, 0.5, 1, 5, 20 mM), following with additional incubation for 24 h. The cultured cells exposed to only  $\alpha$ -MEM (0 mM of COOHSiT or COOHSi) were later recorded as control. Thereafter, MTT solution prepared at 5 mg/mL in PBS was added to each well until reaching a concentration of 0.5 mg/mL. The wells were then incubated for 3 h before removing the medium. Finally, 500  $\mu\text{L}$  of DMSO was dispensed to each well for dissolving the formazan crystals and forming purple solutions with different intensities. The absorbance values of the final solutions were determined by a BioTek Synergy 2 Microplate Reader under a 540 nm light wavelength. The mean value was calculated from three experimental replicates and reported as percentages in reference to the control values.

## Surface characterizations

*Surface hydrophilicity:* Wetting behavior of modified surfaces were examined via water contact angles measured by the sessile drop method. Briefly, a 5  $\mu\text{L}$  water droplet was placed randomly on at least three spots of the tested surface using a micro-syringe. The angle formed between the tangent to the droplet at the three-phase boundary (solid-liquid-air interface) and the solid surface was captured by an optical contact angle goniometer (Phoenix mini, Surface Electro Optics, Seoul, Korea).

*Thin film thickness:* An ellipsometer (alpha-SE, J.A. Woollam Co., US) was applied to record the thickness of COOHSiT and COOHSi thin films. The He-Ne laser, emitting light at a wavelength of 632.8 nm, was incident to the surface at three distinct angles: 65°, 70°, and 75°. Measurements were conducted on three randomly selected areas on each substrate before and after each modification.

*Surface morphology:* The surface profile of bare and coated samples was captivated by an AFM SPI 3800N (Hitachi, Japan) using the AFM cantilevers (Olympus Corporation, Japan) with parameters as: spring frequency = 70 kHz, force constant = 2.0 N/m, tip radius = 7 nm. Surface topography and statistical roughness were acquired at three random locations of each substrate.

*Chemical composition of coatings:* The elemental composition and chemical state of coatings were determined by an XPS (Sigma Probe, Thermo VG Scientific) with a narrowly focused and single-wavelength X-ray source (1486.6 eV and 25 W) using aluminum K-alpha radiation. Atomic detection limit is 0.1% and X-ray spot size exhibit a range of 15 – 400  $\mu\text{m}$ . The experiment was conducted within an ultra-high vacuum condition with a pressure of  $10^{-8}$  Pascal, and the take-off angle of photoelectron source was fixed at 45°. The photoelectron spectra were acquired using an analyzer with a pass energy of 23.5 eV, ensuring a resolution precisely maintained within 0.2 eV and calibrated against the Si2p<sub>3/2</sub> peak at 98.5 eV. The high-resolution Si2p spectra were deconvoluted by Voigt function in the Origin software. Information regarding atomic percentage of each substrate was quantified on the spectra of Si2p, C1s and N1s.

*Fourier-Transform Infrared Spectrometry:* FTIR spectrometer (Bruker, Vertex 80v, Germany), specifically designed for high-resolution infrared spectroscopy, was deployed to identify the spectra of modified Si wafers with a resolution of 1  $\text{cm}^{-1}$ . Modified

wafers were analyzed under an infrared beam with incident angle of 80° using Attenuated Total Reflectance (ATR) mode to explore the nanoscale-analyzed surface.

### **Statistical analysis**

Student's t-test was applied for analyzing the experimental results and the statistical data were presented as means  $\pm$  standard deviation (SD) or standard error of the mean (SEM). The probabilities of  $p \leq 0.05$  were considered as significant difference. All the data processing and presentation were operated in Origin 9.0 software (OriginLab Corporation, MA, USA).

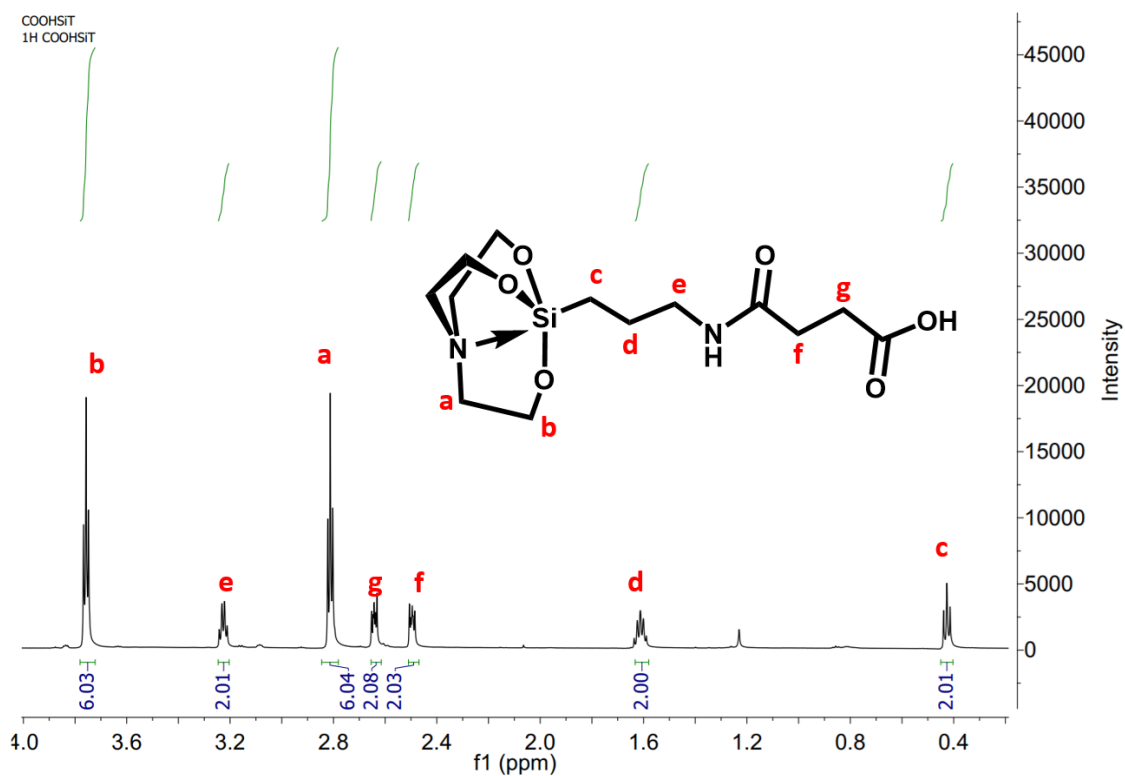

**Figure S1.** NMR characterization for COOHSiT. <sup>1</sup>H NMR (600 MHz, CDCl<sub>3</sub>)  $\delta$ : (ppm) = 0.38–0.44 (SiCH<sub>2</sub>CH<sub>2</sub>CH<sub>2</sub>, 2H), 1.58–1.64 (SiCH<sub>2</sub>CH<sub>2</sub>CH<sub>2</sub>, 2H), 3.20–3.26 (SiCH<sub>2</sub>CH<sub>2</sub>CH<sub>2</sub>NH, 2H), 2.78–2.84 (OCH<sub>2</sub>CH<sub>2</sub>, 6H), 3.72–3.78 (OCH<sub>2</sub>CH<sub>2</sub>, 6H), 2.48–2.52 (COCH<sub>2</sub>CH<sub>2</sub>, 2H), 2.66–2.70 (COCH<sub>2</sub>CH<sub>2</sub>, 2H).

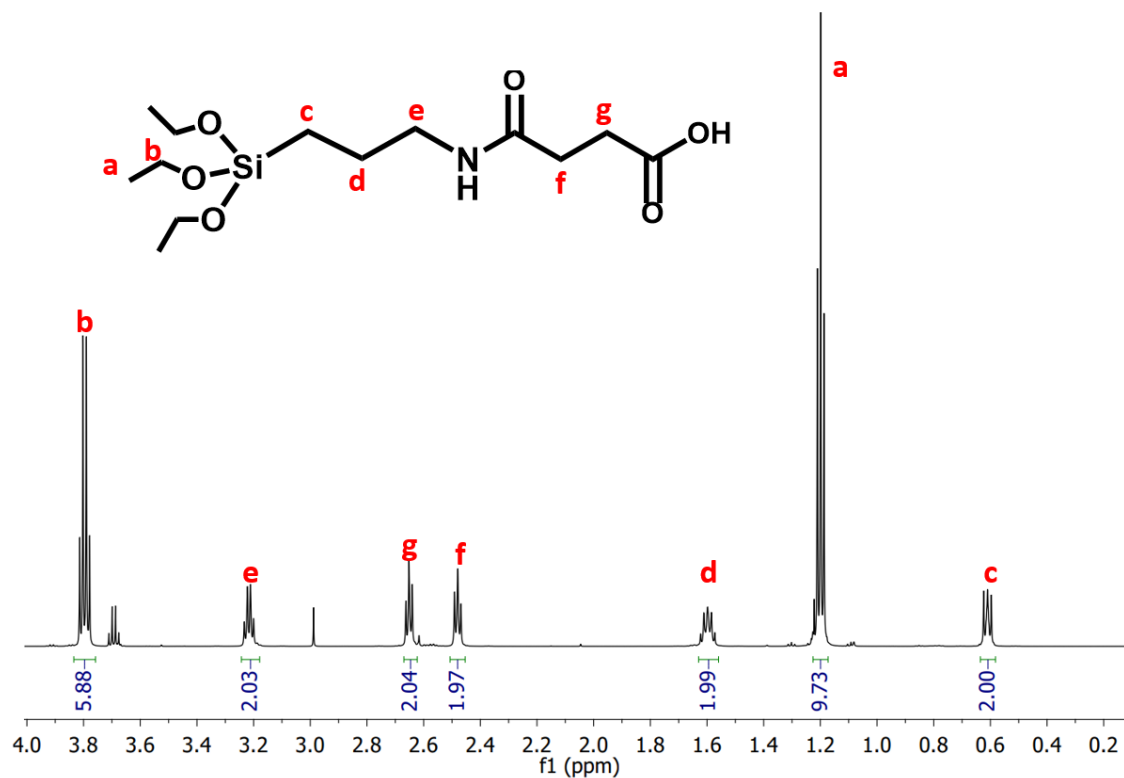

**Figure S2.** NMR characterization for COOHSi. <sup>1</sup>H NMR (600 MHz, CDCl<sub>3</sub>) δ: (ppm) = 0.58–0.62 (SiCH<sub>2</sub>CH<sub>2</sub>CH<sub>2</sub>, 2H), 1.58–1.64 (SiCH<sub>2</sub>CH<sub>2</sub>CH<sub>2</sub>, 2H), 3.20–3.26 (SiCH<sub>2</sub>CH<sub>2</sub>CH<sub>2</sub>NH, 2H), 3.78–3.84 (OCH<sub>2</sub>CH<sub>3</sub>, 6H), 1.18–1.22 (OCH<sub>2</sub>CH<sub>3</sub>, 9H), 2.48–2.52 (COCH<sub>2</sub>CH<sub>2</sub>, 2H), 2.66–2.70 (COCH<sub>2</sub>CH<sub>2</sub>, 2H).

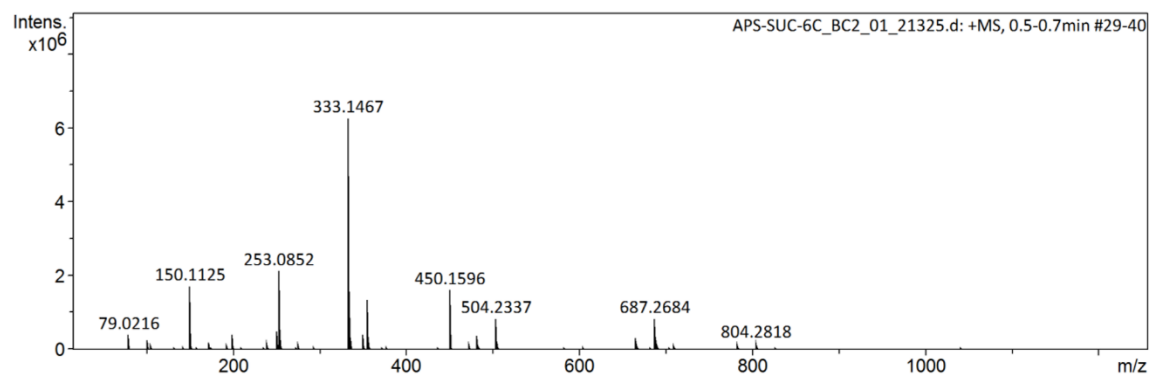

**Figure S3.** Mass spectrum of COOHSiT. Molecular weight of COOHSiT is 332.43 g/mol.

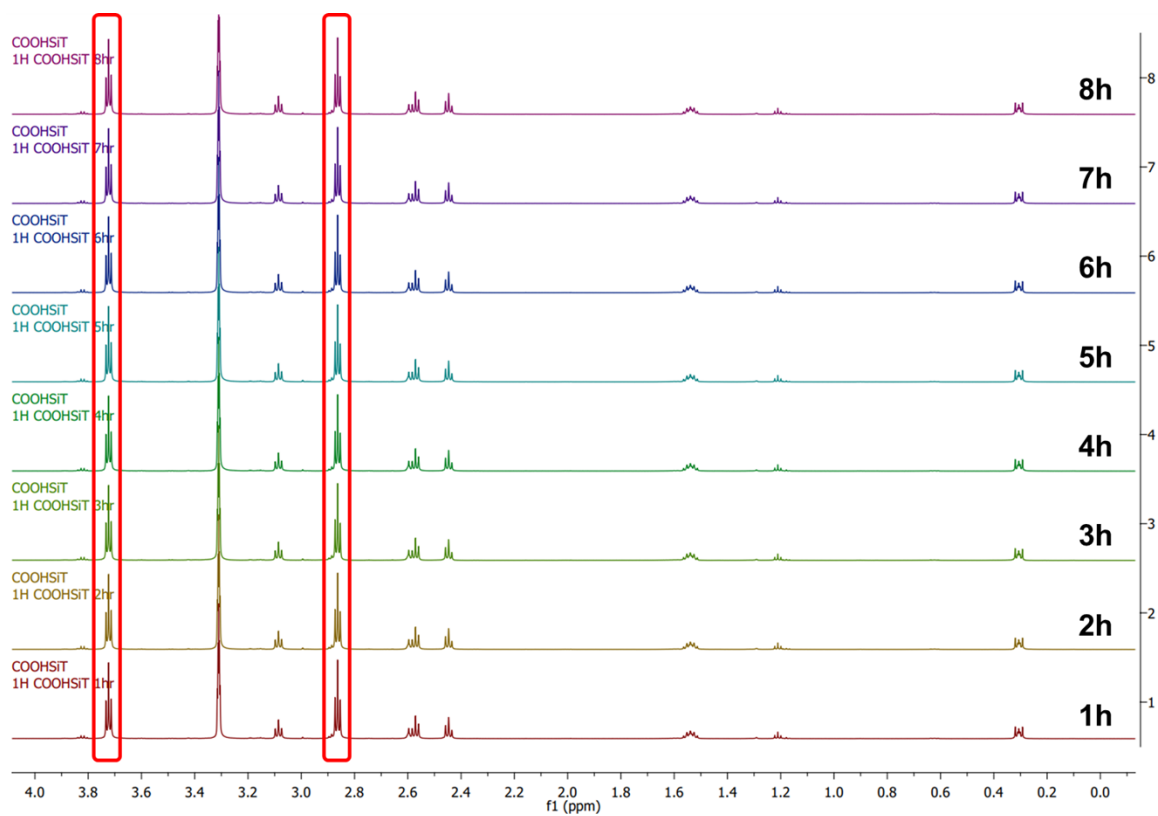

**Figure S4.** Time-course NMR spectra of COOHSiT in MeOD containing 10% d<sub>2</sub>H<sub>2</sub>O.



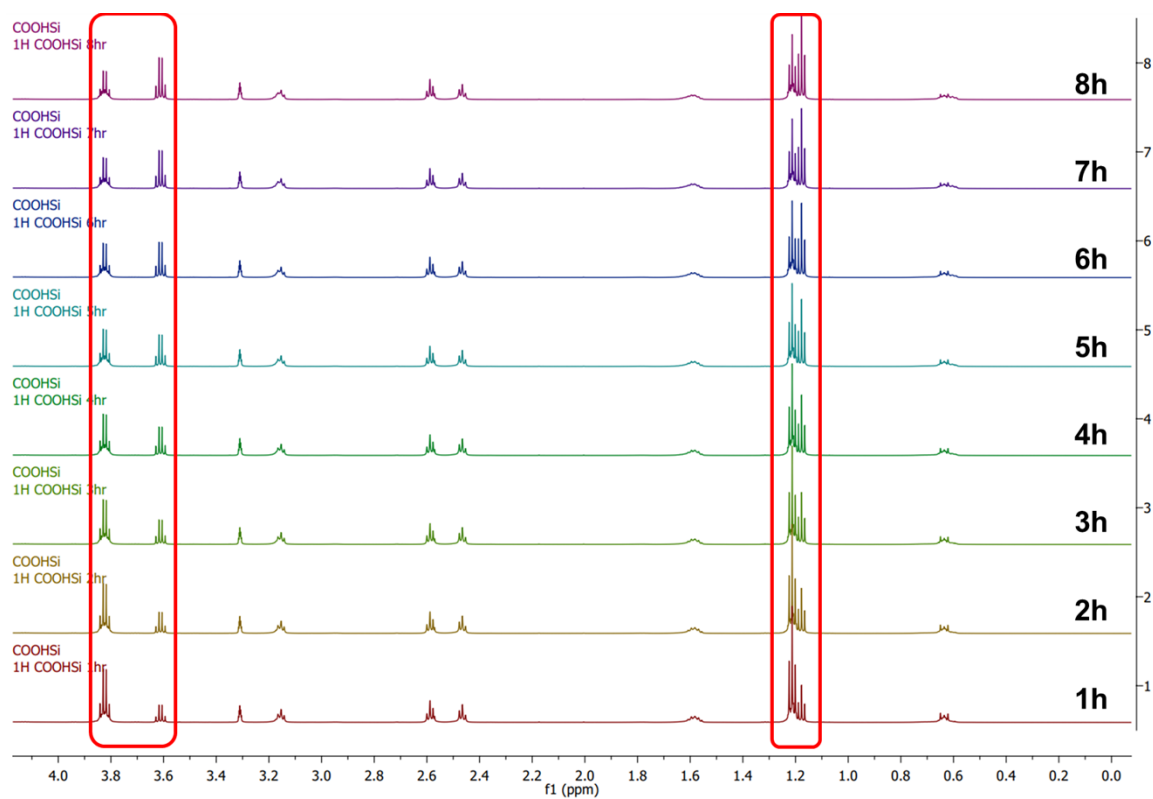

**Figure S5.** Time-course NMR spectra of COOHSi in MeOD containing 10% diH<sub>2</sub>O.

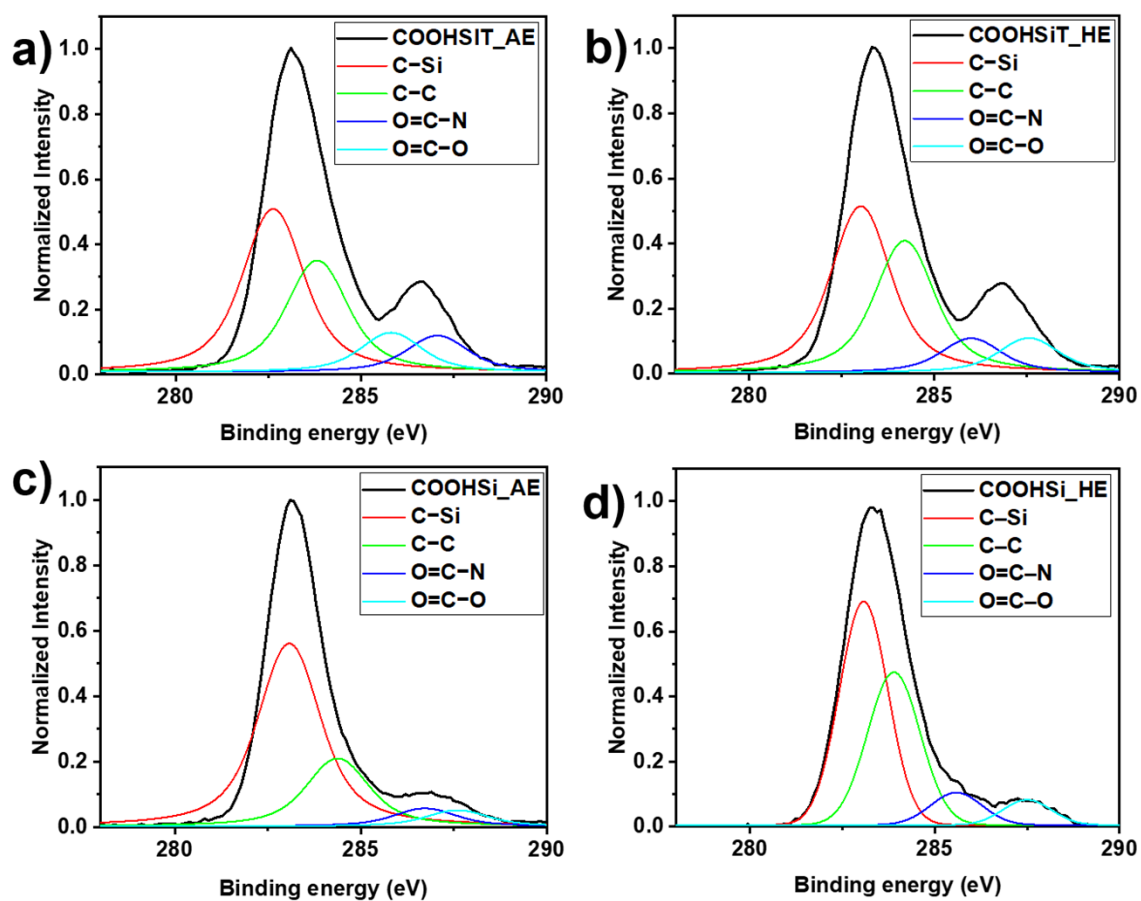

**Figure S6.** Deconvolution of XPS C1s peaks of wafers modified with (a) COOHSiT in anhydrous ethanol, (b) COOHSiT in hydrated ethanol, (c) COOHSi in anhydrous ethanol and (d) COOHSi in hydrated ethanol.

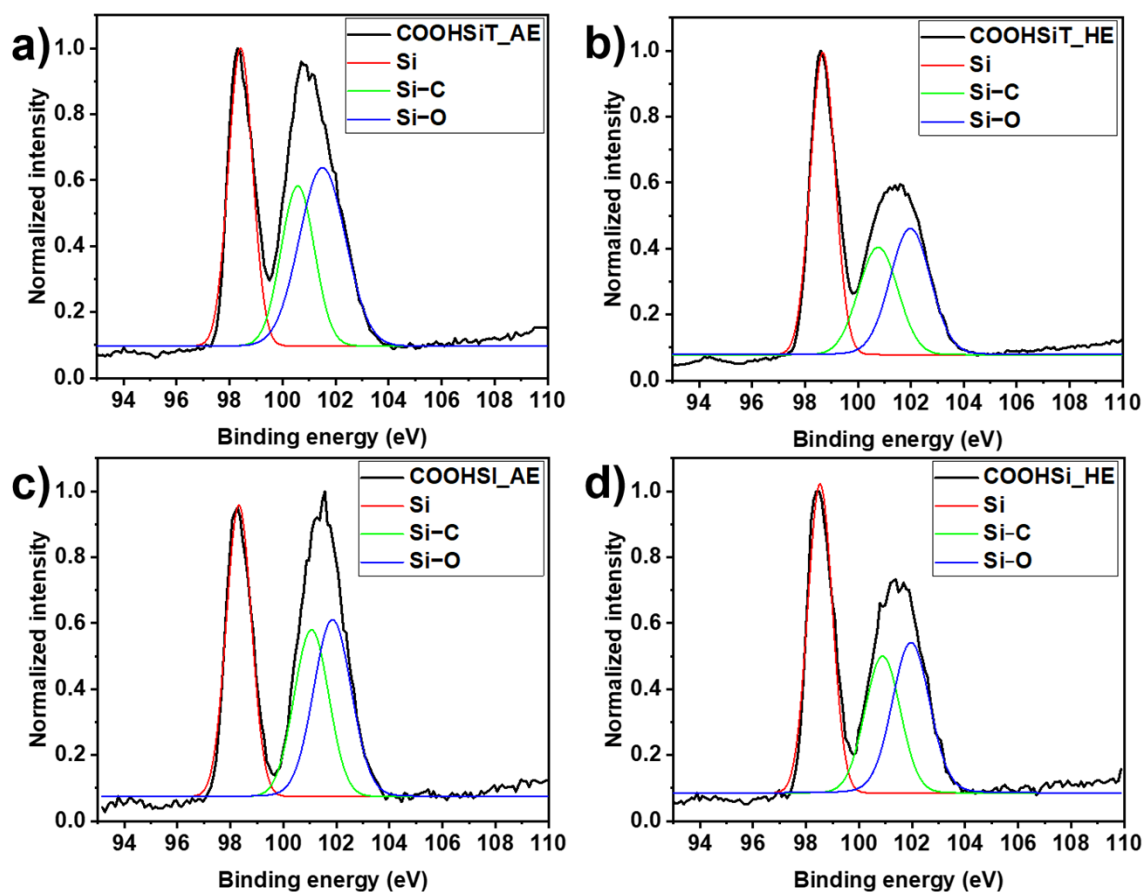

**Figure S7.** Deconvolution of XPS Si<sub>2</sub>p peaks of wafers modified with (a) COOHSiT in anhydrous ethanol, (b) COOHSiT in hydrated ethanol, (c) COOHSi in anhydrous ethanol and (d) COOHSi in hydrated ethanol.

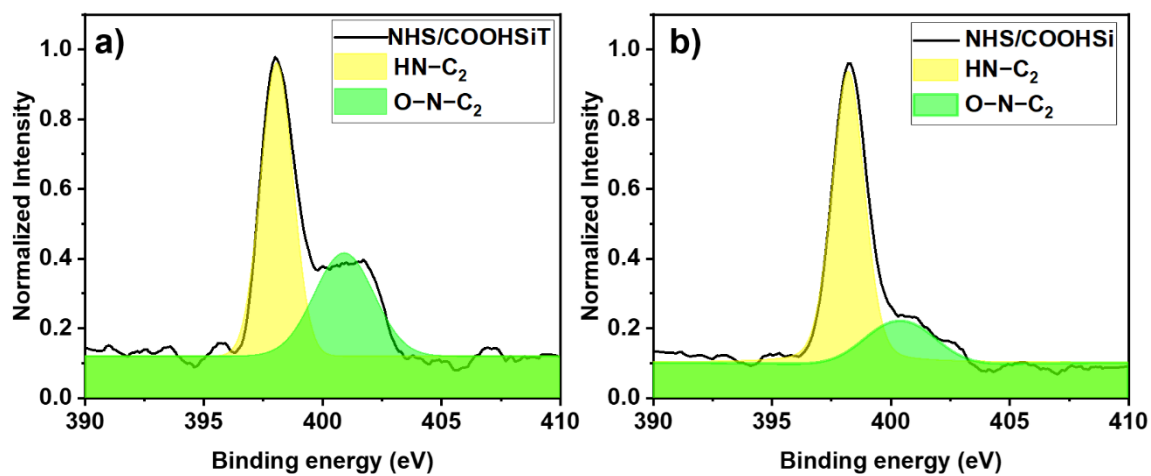

**Figure S8.** Deconvolution of XPS N1s peaks of (a) COOHSiT- and (b) COOHSi-coated wafers after EDC/NHS activation.

**Table S1.** Solubility profile of COOHSiT and COOHSi across different organic solvents.

| Solvents      | COOHSiT          | COOHSi           |
|---------------|------------------|------------------|
| Water         | Soluble          | Soluble          |
| DMF           | Soluble          | Soluble          |
| DMSO          | Soluble          | Soluble          |
| Methanol      | Soluble          | Slightly soluble |
| Ethanol       | Slightly soluble | Slightly soluble |
| Acetonitrile  | Slightly soluble | Slightly soluble |
| Chloroform    | Slightly soluble | Slightly soluble |
| Acetone       | Slightly soluble | Insoluble        |
| DCM           | Insoluble        | Insoluble        |
| Diethyl ether | Insoluble        | Insoluble        |
| Toluene       | Insoluble        | Insoluble        |
| n-pentane     | Insoluble        | Insoluble        |
| n-hexane      | Insoluble        | Insoluble        |

**Table S2.** Atomic% of COOHSiT- and COOHSi-modified wafers calculated by XPS.

| Atomic% | COOHSiT<br>(anhydrous) | COOHSi<br>(anhydrous) | COOHSiT<br>(aqueous) | COOHSi<br>(aqueous) |
|---------|------------------------|-----------------------|----------------------|---------------------|
| C1s     | 43.7                   | 38.87                 | 41.02                | 41.64               |
| Si2p    | 17.46                  | 21.54                 | 20.69                | 16.85               |
| N1s     | 5.4                    | 5.49                  | 5.23                 | 7.14                |
| O1s     | 33.14                  | 34.1                  | 33.06                | 34.36               |

**Table S3.** Atomic% of COOH-terminated wafers after NHS activation calculated by XPS.

| Atomic% | NHS/COOHSiT | NHS/COOHSi |
|---------|-------------|------------|
| C1s     | 27.37       | 17.38      |
| Si2p    | 25.06       | 39.83      |
| N1s     | 1.75        | 1.74       |
| O1s     | 45.82       | 41.05      |
